# Supplementary material for: A Reconstructed Human Melanoma-in-Skin Model to Study Immune Modulatory and Angiogenic Mechanisms Facilitating Initial Melanoma Growth and Invasion
Source: MDPI journal article supplement (doi:10.3390/cancers15102849), 2023-05-20
Supplement: s1 [file s1]

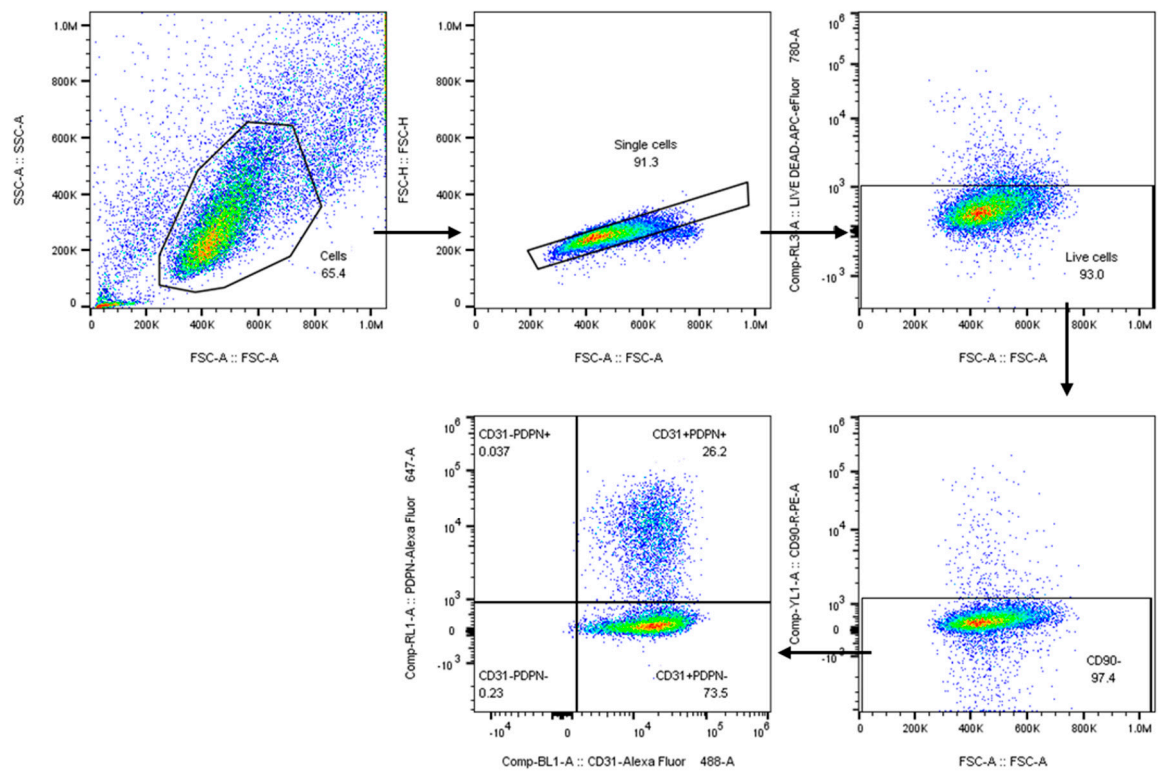

Figure S1. Gating strategy to analyze dermal endothelial cells (ECs).

(a) pro-inflammation

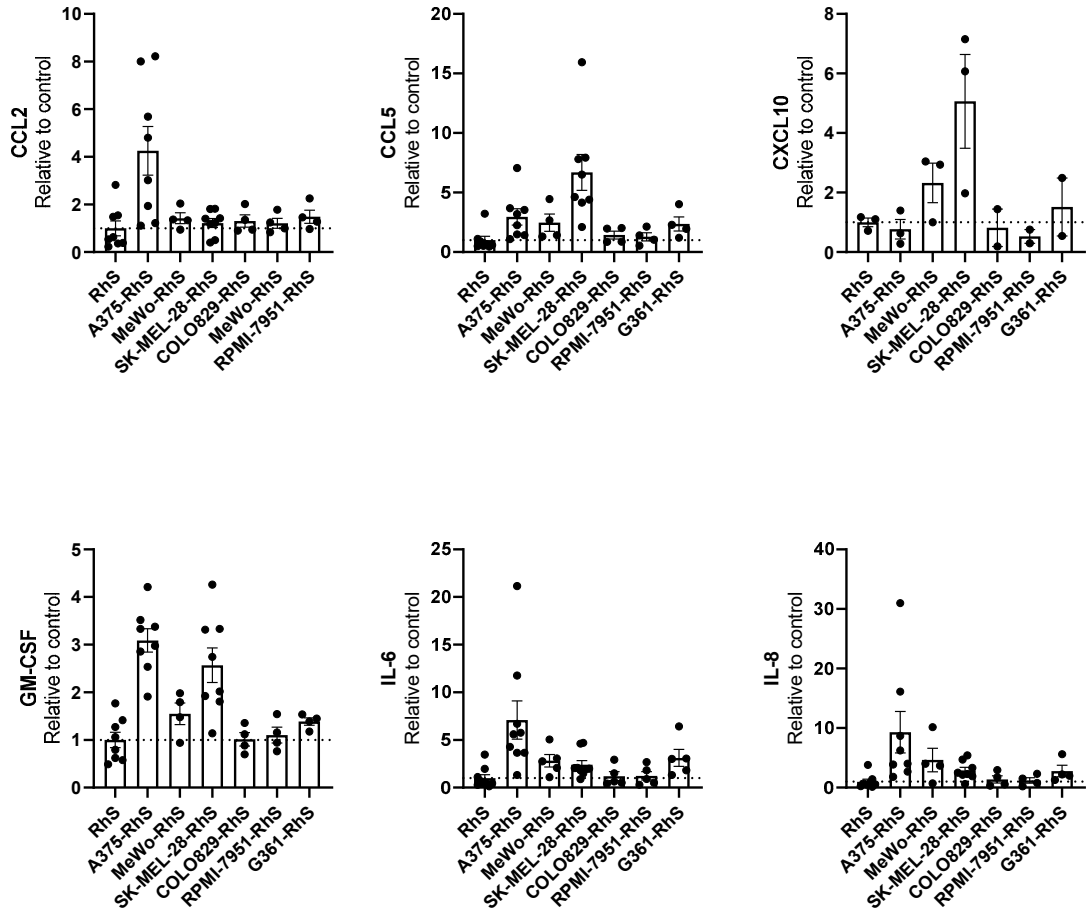

(b) anti-inflammation

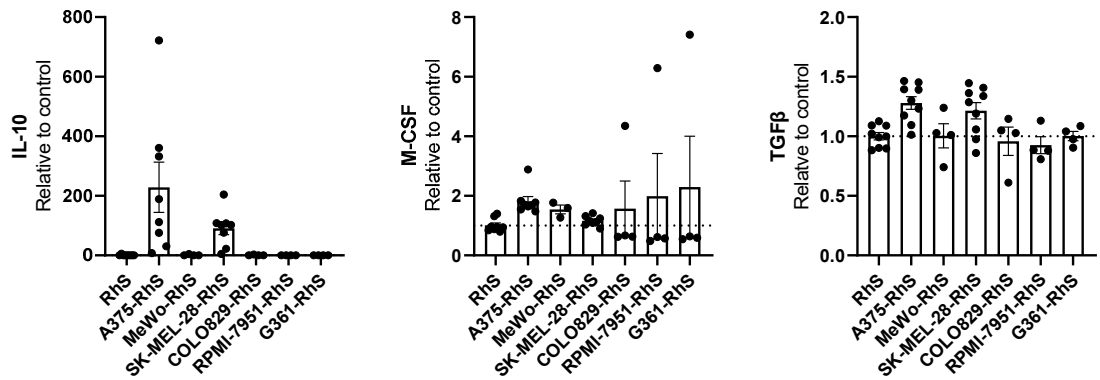

Figure S2. Cytokine secretion in the supernatants from either RhS or Mel-RhS constructed with A375, MeWo, SK-MEL-28, COLO829, RPMI-7951, G361 cells.

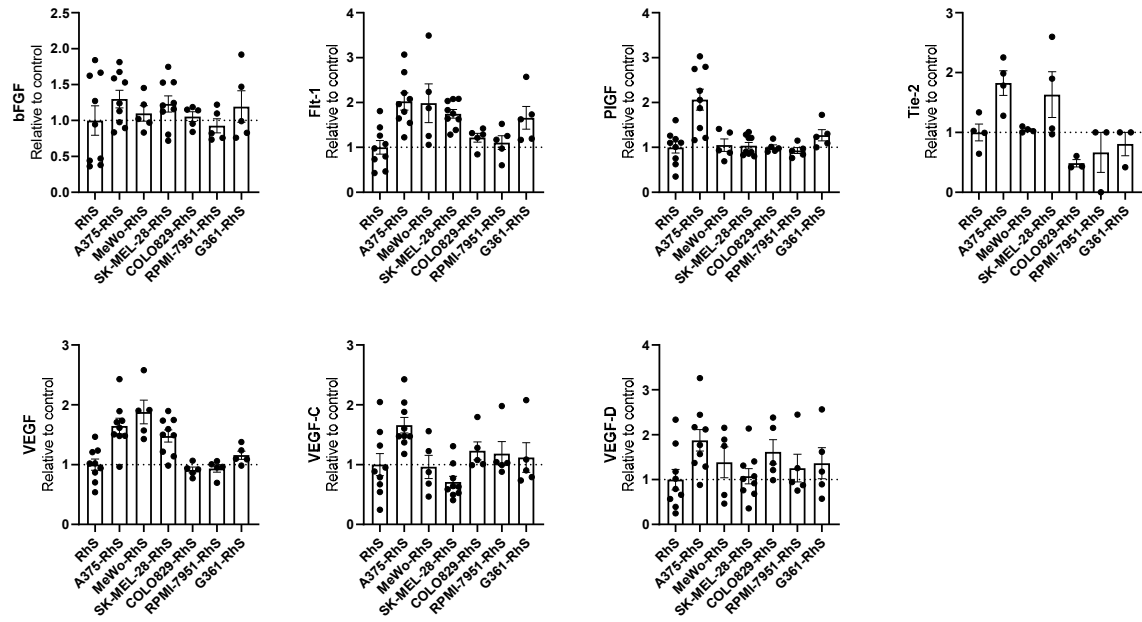

Figure S3. Levels of pro-angiogenic factors in supernatants from either RhS or Mel-RhS constructed with A375, MeWo, SK-MEL-28, COLO829, RPMI-7951, G361 cells.

## 3D model

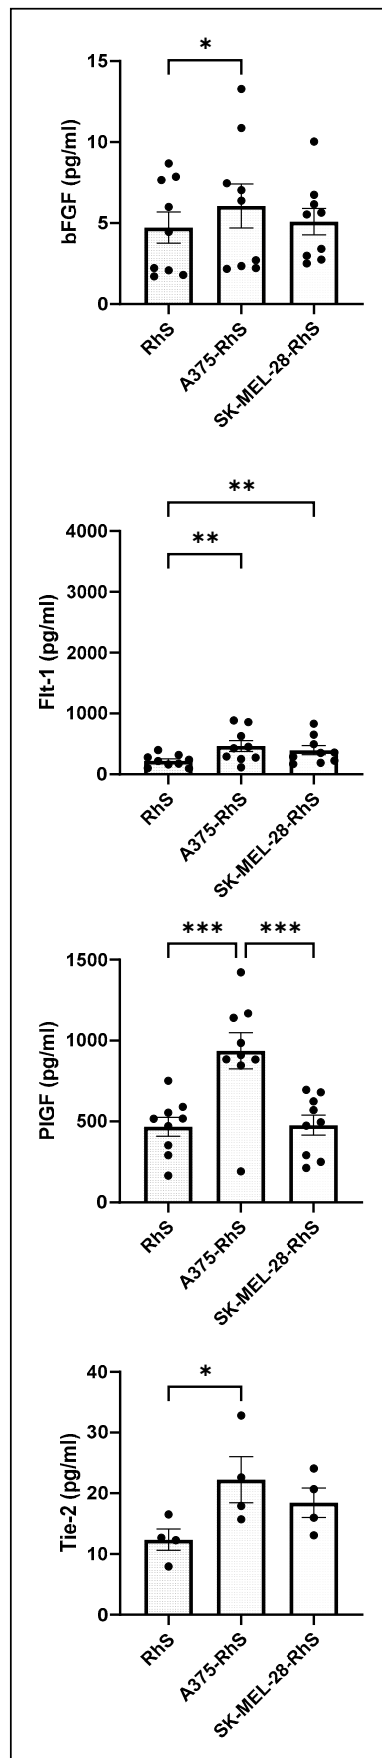

## 2D culture

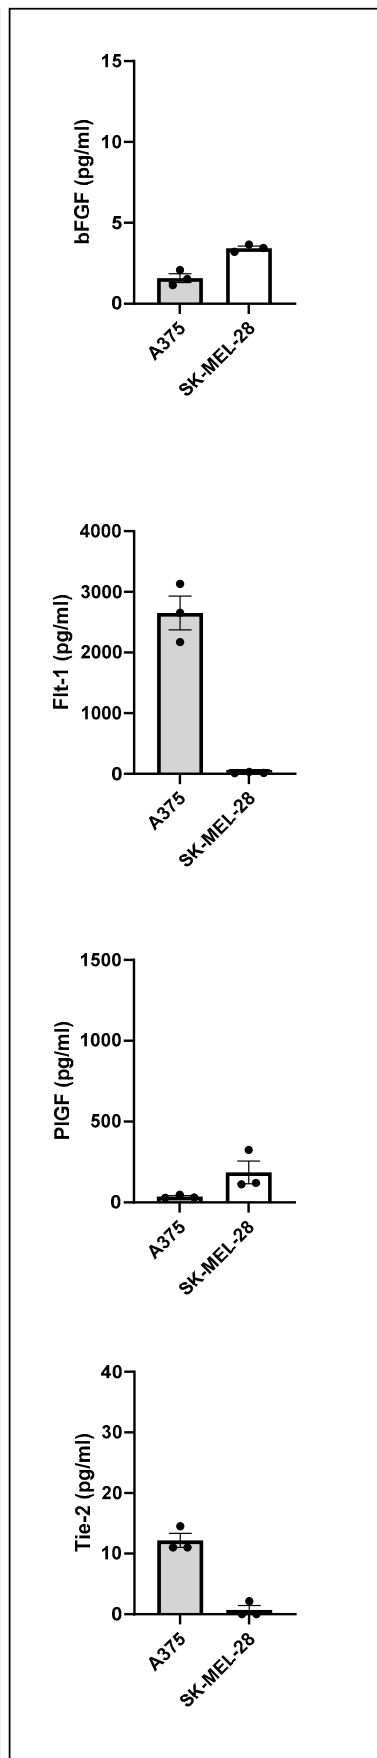

## 3D model

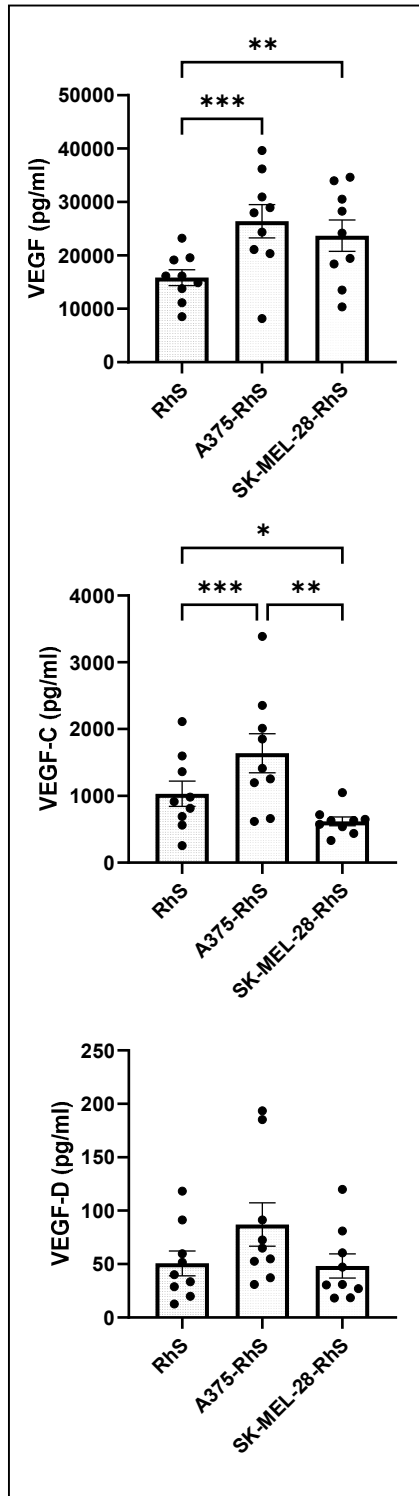

## 2D culture

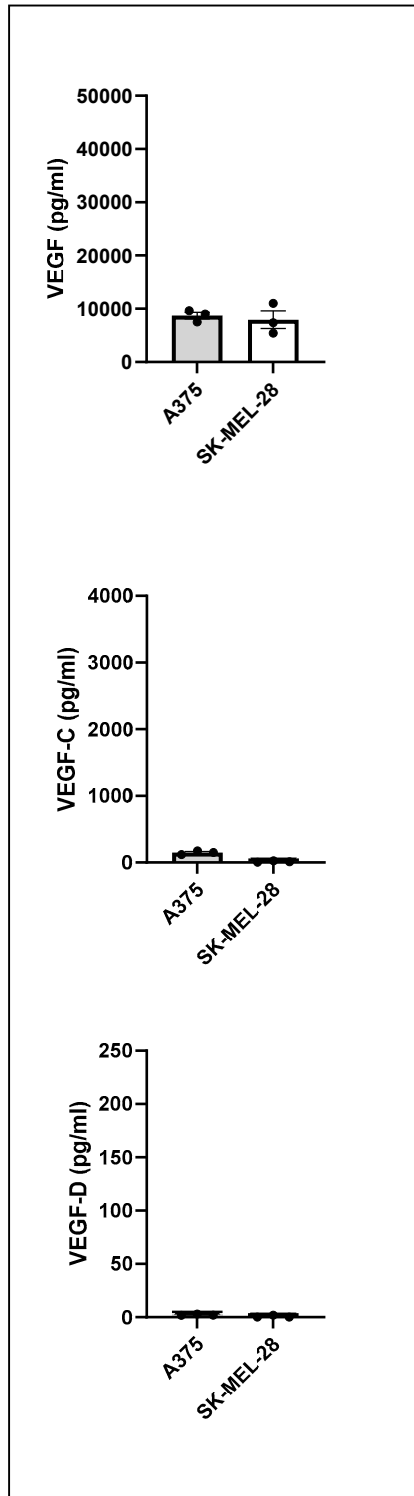

Figure S4. Release of angiogenic factors in cultures supernatants from the 3D models (right panel) and from confluent 2D melanoma cell monolayers (right panel).

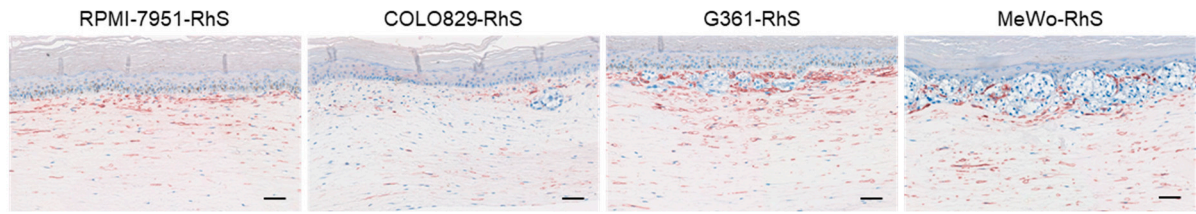

Figure S5. Mel-RhS constructed with either RPMI-7951, COLO829, G361, or MeWo cells were cultured for 4 weeks at the air-liquid interface and stained for  $\alpha$ -SMA.

Table S1. Cytokine secretion in the supernatant of the skin (RhS) and melanoma (Mel-RhS) models constructed with the different melanoma cell lines (A375, COLO829, G361, MeWo, RPMI-7951, and SK-MEL-28).

| Cytokine      | RhS            | A375-RhS      | COLO829-RhS     | G361-RhS       | MeWo-RhS        | RPMI-7951-RhS | SK-MEL-28-RhS  |
|---------------|----------------|---------------|-----------------|----------------|-----------------|---------------|----------------|
| <b>CCL2</b>   | 14506 ± 4575   | 84492 ± 39764 | 6568 ± 415.1    | 7488 ± 91.83   | 7242 ± 162.2    | 6151 ± 215.5  | 13667 ± 3817   |
| <b>CCL5</b>   | 37.27 ± 12.21  | 86.66 ± 17.54 | 55.86 ± 19.81   | 81.71 ± 22.65  | 90.16 ± 30.25   | 42.13 ± 9.477 | 183.7 ± 25.54  |
| <b>CXCL10</b> | 65.75 ± 28.15  | 69.25 ± 29.59 | 82.98 ± 36.85   | 113.7 ± 71.38  | 184.7 ± 80.83   | 34.7 ± 21.58  | 353.5 ± 137.4  |
| <b>IL-6</b>   | 3886 ± 1395    | 20962 ± 9180  | 3712 ± 812.7    | 12153 ± 3559   | 11837 ± 3594    | 3528 ± 250.4  | 7930 ± 2728    |
| <b>IL-8</b>   | 3771 ± 1594    | 19649 ± 4738  | 2968 ± 701.7    | 8070 ± 3461    | 8886 ± 738.6    | 2461 ± 366.3  | 8927 ± 3673    |
| <b>IL-10</b>  | 1.657 ± 1.514  | 149.7 ± 44.59 | 0.7588 ± 0.7588 | 0              | 0.9325 ± 0.9325 | 0             | 61.39 ± 9.154  |
| <b>GM-CSF</b> | 50.2 ± 8.126   | 148.5 ± 23.68 | 55.61 ± 18.79   | 76.6 ± 24.72   | 78.07 ± 23.1    | 52.29 ± 11.39 | 117.3 ± 16     |
| <b>M-CSF</b>  | 667.2 ± 157.8  | 1158 ± 227.2  | 1037 ± 77.72    | 1213 ± 54.38   | 1182 ± 87.5     | 917.2 ± 32.54 | 820.2 ± 162.7  |
| <b>TGFβ</b>   | 495.5 ± 30.05  | 688.3 ± 64.73 | 456.7 ± 46.05   | 482.9 ± 23.68  | 478.8 ± 30.48   | 442.7 ± 15.96 | 618.7 ± 28.93  |
| <b>bFGF</b>   | 4.714 ± 0.9627 | 6.053 ± 1.361 | 7.158 ± 0.6177  | 7.614 ± 0.4998 | 7.395 ± 0.6866  | 6.394 ± 1.067 | 5.082 ± 0.8192 |
| <b>Flt-1</b>  | 221.2 ± 33.44  | 464.7 ± 90.62 | 272.5 ± 57.05   | 391.8 ± 122.1  | 459.8 ± 169.6   | 248 ± 67.23   | 395.7 ± 74.89  |
| <b>PlGF</b>   | 468 ± 58.2     | 937.3 ± 111.9 | 367.5 ± 65.27   | 474 ± 114.7    | 384.6 ± 95.64   | 344.9 ± 73.49 | 477.3 ± 61.8   |
| <b>Tie-2</b>  | 12.36 ± 1.751  | 22.26 ± 3.799 | 2.924 ± 1.502   | 2.424 ± 1.197  | 1.447 ± 0.9494  | 0             | 18.46 ± 2.441  |
| <b>VEGF</b>   | 15838 ± 1493   | 26412 ± 3121  | 11781 ± 1005    | 15459 ± 2439   | 25497 ± 5001    | 12046 ± 1114  | 23703 ± 2935   |
| <b>VEGF-C</b> | 1032 ± 189.9   | 1639 ± 292.2  | 945.4 ± 229.6   | 778.5 ± 150.1  | 710.6 ± 164.1   | 850.3 ± 161.1 | 617.5 ± 66.57  |
| <b>VEGF-D</b> | 50.64 ± 11.54  | 87.07 ± 20.26 | 42.48 ± 7.53    | 33.36 ± 4.92   | 35.87 ± 10.05   | 31.74 ± 5.264 | 48.21 ± 11.3   |

Table S2. Pearson correlation between cytokines secreted in culture supernatants from RhS and SK-MEL-28-RhS and marker expression on conditioned monocytes.

| p value         | CD1a+    | CD1a-CD14- | CD14+    | BDCA3+   | BDCA3-CD14- | BDCA3-CD14+ | BDCA3+CD14- | BDCA3+CD14+ | CD80+    | CD80 MFI | CD163+   | CD163 MFI | CD16+    | CD16 MFI | CD14+CD163+CD16+ | PD-L1 MFI | PD-L1+   | PD-L2 MFI | PD-L2+   |
|-----------------|----------|------------|----------|----------|-------------|-------------|-------------|-------------|----------|----------|----------|-----------|----------|----------|------------------|-----------|----------|-----------|----------|
| CCL2            | 0.171573 | 0.688114   | 0.430910 | 0.755713 | 0.508506    | 0.526741    | 0.632399    | 0.862817    | 0.820723 | 0.706118 | 0.593804 | 0.201566  | 0.808425 | 0.256283 | 0.388472         | 0.398332  | 0.535006 | 0.188975  | 0.514280 |
| CCL22           | 0.991597 | 0.638654   | 0.731774 | 0.203271 | 0.705103    | 0.616225    | 0.793134    | 0.198237    | 0.971637 | 0.296806 | 0.803854 | 0.806703  | 0.766872 | 0.927275 | 0.739749         | 0.613963  | 0.906270 | 0.464167  | 0.897886 |
| CXCL10          | 0.214935 | 0.378734   | 0.276398 | 0.710167 | 0.246233    | 0.471091    | 0.277815    | 0.253440    | 0.224824 | 0.395681 | 0.184481 | 0.684193  | 0.183553 | 0.519849 | 0.245382         | 0.164434  | 0.511369 | 0.547993  | 0.469971 |
| IL-6            | 0.062034 | 0.487428   | 0.240870 | 0.270529 | 0.309363    | 0.670713    | 0.444741    | 0.208097    | 0.718455 | 0.965267 | 0.375904 | 0.157113  | 0.584420 | 0.172379 | 0.216676         | 0.080388  | 0.431894 | 0.091645  | 0.405030 |
| IL-8            | 0.022036 | 0.164483   | 0.064580 | 0.392551 | 0.118266    | 0.262112    | 0.164318    | 0.227577    | 0.396799 | 0.751582 | 0.123708 | 0.042338  | 0.222381 | 0.039682 | 0.061753         | 0.036697  | 0.270138 | 0.050721  | 0.280892 |
| IL-10           | 0.032359 | 0.044977   | 0.024000 | 0.171094 | 0.025510    | 0.280466    | 0.078584    | 0.011478    | 0.074061 | 0.442844 | 0.022445 | 0.062965  | 0.023281 | 0.056571 | 0.020288         | 0.020130  | 0.272960 | 0.053524  | 0.296346 |
| GM-CSF          | 0.449503 | 0.135376   | 0.172404 | 0.648545 | 0.204314    | 0.100909    | 0.161138    | 0.955596    | 0.021766 | 0.968726 | 0.168173 | 0.103641  | 0.145229 | 0.125053 | 0.159199         | 0.462718  | 0.250454 | 0.234931  | 0.283769 |
| M-CSF           | 0.034442 | 0.067172   | 0.033789 | 0.894102 | 0.092521    | 0.152229    | 0.086379    | 0.299101    | 0.469543 | 0.769497 | 0.059959 | 0.124938  | 0.094943 | 0.102735 | 0.041577         | 0.166302  | 0.315194 | 0.170407  | 0.339928 |
| TGFβ            | 0.002745 | 0.004288   | 0.001126 | 0.751666 | 0.010261    | 0.008632    | 0.003872    | 0.332553    | 0.038951 | 0.378559 | 0.004276 | 0.007781  | 0.009997 | 0.002956 | 0.001601         | 0.054487  | 0.049802 | 0.048747  | 0.072369 |
| VEGF            | 0.774302 | 0.957164   | 0.983065 | 0.028074 | 0.563413    | 0.076326    | 0.820349    | 0.034507    | 0.125375 | 0.117352 | 0.832265 | 0.875228  | 0.710526 | 0.672113 | 0.871149         | 0.012313  | 0.746955 | 0.581788  | 0.504836 |
| Pearson r value | CD1a+    | CD1a-CD14- | CD14+    | BDCA3+   | BDCA3-CD14- | BDCA3-CD14+ | BDCA3+CD14- | BDCA3+CD14+ | CD80+    | CD80 MFI | CD163+   | CD163 MFI | CD16+    | CD16 MFI | CD14+CD163+CD16+ | PD-L1 MFI | PD-L1+   | PD-L2 MFI | PD-L2+   |
| CCL2            | -0.30991 | -0.09311   | 0.18156  | 0.07222  | -0.15278    | 0.14634     | -0.11085    | 0.04015     | 0.05264  | -0.08748 | 0.12350  | 0.29042   | 0.05632  | 0.25934  | 0.19846          | 0.19445   | 0.14346  | 0.29834   | 0.15073  |
| CCL22           | 0.00245  | 0.10883    | -0.07955 | -0.28937 | 0.08780     | 0.11611     | -0.06090    | -0.29248    | -0.00826 | -0.23898 | -0.05768 | -0.05683  | -0.06883 | -0.02121 | -0.07710         | -0.11685  | 0.02736  | -0.16893  | 0.02982  |
| CXCL10          | -0.28236 | -0.20248   | 0.24900  | 0.08623  | -0.26470    | 0.16636     | -0.24829    | 0.26084     | 0.27660  | 0.19552  | 0.30126  | 0.09434   | 0.30187  | 0.14876  | 0.26516          | 0.31489   | 0.15176  | 0.13897   | 0.16677  |
| IL-6            | -0.41406 | -0.16037   | 0.26761  | 0.25197  | -0.23303    | 0.09859     | -0.17624    | 0.28644     | 0.08366  | 0.10102  | 0.20366  | 0.32015   | 0.12662  | 0.30936  | 0.28133          | 0.39014   | 0.18118  | 0.37744   | 0.19175  |
| IL-8            | -0.49956 | -0.31485   | 0.41045  | 0.19679  | -0.35142    | 0.25629     | -0.31497    | 0.27503     | 0.19507  | -0.07348 | 0.34663  | 0.44673   | 0.27801  | 0.45199  | 0.41447          | 0.45824   | 0.25216  | 0.43164   | 0.24676  |
| IL-10           | -0.46808 | -0.44175   | 0.49042  | 0.31024  | -0.48597    | 0.24697     | -0.39230    | 0.54017     | 0.39788  | 0.17697  | 0.49525  | 0.41273   | 0.49262  | 0.42221  | 0.50240          | 0.50294   | 0.25073  | 0.42702   | 0.23920  |
| GM-CSF          | 0.17444  | 0.33687    | -0.30934 | 0.10565  | 0.28873     | -0.36782    | 0.31724     | 0.01294     | -0.49744 | -0.00911 | -0.31226 | -0.36511  | -0.32907 | -0.34548 | -0.31864         | -0.16947  | -0.26243 | -0.27090  | -0.24533 |
| M-CSF           | -0.46323 | -0.40688   | 0.46473  | 0.03094  | -0.37650    | 0.32376     | -0.38323    | 0.23788     | 0.16693  | -0.06804 | 0.41709  | 0.34558   | 0.37394  | 0.36600  | 0.44821          | 0.31357   | 0.23031  | 0.31071   | 0.21912  |
| TGFβ            | -0.61949 | -0.59682   | 0.66020  | -0.07346 | -0.54713    | 0.55759     | -0.60216    | 0.22240     | 0.45348  | -0.20255 | 0.59697  | 0.56372   | 0.54873  | 0.61585  | 0.64481          | 0.42548   | 0.43320  | 0.43501   | 0.40003  |
| VEGF            | -0.15163 | 0.02857    | 0.01129  | 0.85988  | -0.30006    | -0.76504    | 0.12035     | 0.84423     | 0.69497  | 0.70546  | 0.11230  | 0.08337   | 0.19547  | 0.22225  | 0.08611          | 0.90798   | 0.17034  | 0.28666   | 0.34364  |



Table S3. Pearson correlation between cytokines secreted in culture supernatants from RhS and A375-RhS and marker expression on conditioned monocytes.

| p value         | CD1a+     | CD1a-CD14- | CD14+     | BDCA3+    | BDCA3-CD14- | BDCA3-CD14+ | BDCA3+CD14- | BDCA3+CD14+ | CD80+     | CD80 MFI  | CD163+    | CD163 MFI | CD16+     | CD16 MFI  | CD14+CD163+CD16+ | PD-L1+    | PD-L1 MFI | PD-L2+    | PD-L2 MFI |
|-----------------|-----------|------------|-----------|-----------|-------------|-------------|-------------|-------------|-----------|-----------|-----------|-----------|-----------|-----------|------------------|-----------|-----------|-----------|-----------|
| IL-6            | 0.566340  | 0.497208   | 0.705485  | 0.163711  | 0.226820    | 0.940852    | 0.970656    | 0.253647    | 0.329764  | 0.311409  | 0.787161  | 0.979386  | 0.681586  | 0.506113  | 0.526620         | 0.149104  | 0.074669  | 0.177146  | 0.032416  |
| IL-8            | 0.599937  | 0.564227   | 0.739890  | 0.059851  | 0.199063    | 0.980599    | 0.939462    | 0.182013    | 0.462123  | 0.388216  | 0.549260  | 0.763992  | 0.697427  | 0.697846  | 0.694804         | 0.065855  | 0.024026  | 0.167916  | 0.017167  |
| CXCL10          | 0.139219  | 0.751087   | 0.534977  | 0.382039  | 0.832484    | 0.718230    | 0.953138    | 0.585787    | 0.869414  | 0.437987  | 0.924267  | 0.561376  | 0.118981  | 0.180866  | 0.097945         | 0.259120  | 0.191265  | 0.297249  | 0.055466  |
| CCL2            | 0.693415  | 0.373143   | 0.567059  | 0.004238  | 0.209313    | 0.568373    | 0.175441    | 0.003455    | 0.132623  | 0.061141  | 0.837639  | 0.912877  | 0.501435  | 0.246335  | 0.450047         | 0.216393  | 0.002989  | 0.588459  | 0.214266  |
| CCL5            | 0.221260  | 0.975944   | 0.754001  | 0.086790  | 0.488875    | 0.750204    | 0.880305    | 0.260979    | 0.727195  | 0.366598  | 0.737691  | 0.930032  | 0.257846  | 0.436158  | 0.386669         | 0.066600  | 0.027380  | 0.152536  | 0.038709  |
| VEGF            | 0.315963  | 0.759816   | 0.627339  | 0.610769  | 0.799957    | 0.964407    | 0.532920    | 0.948147    | 0.867101  | 0.860702  | 0.696745  | 0.788031  | 0.100095  | 0.071798  | 0.075714         | 0.282859  | 0.322844  | 0.246683  | 0.066847  |
| IL-10           | 0.946256  | 0.982846   | 0.938422  | 0.932465  | 0.771562    | 0.702597    | 0.997989    | 0.758208    | 0.896934  | 0.669116  | 0.305868  | 0.168834  | 0.816738  | 0.575086  | 0.417391         | 0.187821  | 0.707109  | 0.544127  | 0.810669  |
| TGFβ            | 0.115299  | 0.888780   | 0.609571  | 0.020666  | 0.699310    | 0.299653    | 0.407207    | 0.041224    | 0.578889  | 0.080649  | 0.521627  | 0.300938  | 0.287164  | 0.627054  | 0.234675         | 0.408574  | 0.031262  | 0.578935  | 0.045041  |
| M-CSF           | 0.411972  | 0.413290   | 0.688034  | 0.043791  | 0.347541    | 0.466835    | 0.005039    | 0.013596    | 0.065102  | 0.015055  | 0.544995  | 0.740748  | 0.296428  | 0.018228  | 0.177926         | 0.244427  | 0.110815  | 0.623570  | 0.475130  |
| Pearson r value | CD1a+     | CD1a-CD14- | CD14+     | BDCA3+    | BDCA3-CD14- | BDCA3-CD14+ | BDCA3+CD14- | BDCA3+CD14+ | CD80+     | CD80 MFI  | CD163+    | CD163 MFI | CD16+     | CD16 MFI  | CD14+CD163+CD16+ | PD-L1+    | PD-L1 MFI | PD-L2+    | PD-L2 MFI |
| IL-6            | 0.240385  | -0.282885  | 0.159773  | 0.543634  | -0.481683   | 0.031567    | -0.015653   | 0.458116    | 0.397283  | 0.411271  | 0.114511  | -0.010995 | -0.173257 | -0.277293 | -0.264554        | 0.559732  | 0.660399  | 0.534693  | 0.749134  |
| IL-8            | 0.220400  | -0.241656  | 0.140566  | 0.686885  | -0.507633   | 0.010348    | 0.032309    | 0.524527    | 0.305310  | 0.354978  | 0.250701  | 0.127238  | -0.164305 | -0.164069 | -0.165784        | 0.675732  | 0.774536  | 0.539146  | 0.799806  |
| CXCL10          | 0.571124  | 0.134362   | -0.259416 | 0.359306  | -0.089824   | -0.152631   | -0.025004   | 0.228770    | 0.069873  | 0.321136  | -0.040435 | -0.243372 | -0.595941 | -0.525694 | -0.624416        | 0.453465  | 0.515260  | 0.422333  | 0.695459  |
| CCL2            | 0.166567  | -0.365594  | 0.239953  | 0.876953  | -0.697843   | -0.239165   | 0.531164    | 0.880762    | 0.578976  | 0.684134  | -0.087031 | 0.046533  | 0.280226  | 0.464409  | 0.313185         | 0.491226  | 0.786540  | 0.227185  | 0.493201  |
| CCL5            | 0.486743  | 0.012831   | -0.132750 | 0.640958  | -0.288154   | -0.134800   | 0.064012    | 0.444381    | 0.147627  | 0.370264  | 0.141787  | -0.037351 | -0.454543 | -0.322350 | -0.414947        | 0.674391  | 0.764428  | 0.514005  | 0.842127  |
| VEGF            | 0.407765  | 0.129540   | -0.204372 | 0.214037  | -0.107515   | 0.018988    | -0.260678   | 0.027669    | -0.071119 | 0.074568  | 0.164689  | -0.114035 | -0.621354 | -0.665272 | -0.658653        | 0.433838  | 0.402513  | 0.464107  | 0.673948  |
| IL-10           | -0.028679 | -0.009149  | 0.032865  | 0.036050  | -0.123071   | 0.161396    | -0.001072   | -0.130427   | -0.055080 | -0.180344 | 0.415570  | 0.538174  | 0.098372  | 0.235145  | 0.334930         | 0.518682  | 0.158861  | 0.253824  | 0.101675  |
| TGFβ            | -0.600705 | -0.059457  | 0.214739  | -0.786257 | 0.163245    | 0.420437    | -0.341857   | -0.726510   | -0.232875 | -0.650595 | 0.267639  | 0.419427  | 0.430367  | 0.204537  | 0.474642         | -0.340923 | -0.752367 | -0.232847 | -0.717625 |
| M-CSF           | 0.338607  | -0.337710  | 0.169607  | 0.720482  | -0.384078   | -0.302260   | 0.869391    | 0.815562    | 0.677097  | 0.808844  | -0.253295 | 0.140090  | 0.422982  | 0.795528  | 0.528701         | 0.466066  | 0.606625  | 0.206563  | 0.296921  |
