# Supplementary material for: A Reconstructed Human Melanoma-in-Skin Model to Study Immune Modulatory and Angiogenic Mechanisms Facilitating Initial Melanoma Growth and Invasion
Source: MDPI journal article supplement (doi:10.3390/cancers15102849), 2023-05-20
Supplement: s1 [file s1]

| <i>p</i> value         |          |            |          |          |             |             |             |             |          |          |          |           |          |          |                  |           |          |           |          |
|------------------------|----------|------------|----------|----------|-------------|-------------|-------------|-------------|----------|----------|----------|-----------|----------|----------|------------------|-----------|----------|-----------|----------|
|                        | CD1a+    | CD1a-CD14- | CD14+    | BDCA3+   | BDCA3-CD14- | BDCA3-CD14+ | BDCA3+CD14- | BDCA3+CD14+ | CD80+    | CD80 MFI | CD163+   | CD163 MFI | CD16+    | CD16 MFI | CD14+CD163+CD16+ | PD-L1 MFI | PD-L1+   | PD-L2 MFI | PD-L2+   |
| CCL2                   | 0.171573 | 0.688114   | 0.430910 | 0.755713 | 0.508506    | 0.526741    | 0.632399    | 0.862817    | 0.820723 | 0.706118 | 0.593804 | 0.201566  | 0.808425 | 0.256283 | 0.388472         | 0.398332  | 0.535006 | 0.188975  | 0.514280 |
| CCL22                  | 0.991597 | 0.638654   | 0.731774 | 0.203271 | 0.705103    | 0.616225    | 0.793134    | 0.198237    | 0.971637 | 0.296806 | 0.803854 | 0.806703  | 0.766872 | 0.927275 | 0.739749         | 0.613963  | 0.906270 | 0.464167  | 0.897886 |
| CXCL10                 | 0.214935 | 0.378734   | 0.276398 | 0.710167 | 0.246233    | 0.471091    | 0.277815    | 0.253440    | 0.224824 | 0.395681 | 0.184481 | 0.684193  | 0.183553 | 0.519849 | 0.245382         | 0.164434  | 0.511369 | 0.547993  | 0.469971 |
| IL-6                   | 0.062034 | 0.487428   | 0.240870 | 0.270529 | 0.309363    | 0.670713    | 0.444741    | 0.208097    | 0.718455 | 0.965267 | 0.375904 | 0.157113  | 0.584420 | 0.172379 | 0.216676         | 0.080388  | 0.431894 | 0.091645  | 0.405030 |
| IL-8                   | 0.022036 | 0.164483   | 0.064580 | 0.392551 | 0.118266    | 0.262112    | 0.164318    | 0.227577    | 0.396799 | 0.751583 | 0.123708 | 0.042338  | 0.222381 | 0.039682 | 0.061753         | 0.036697  | 0.270138 | 0.050721  | 0.280892 |
| IL-10                  | 0.032359 | 0.044977   | 0.024000 | 0.171094 | 0.025510    | 0.280466    | 0.078584    | 0.011478    | 0.074061 | 0.442844 | 0.022445 | 0.062965  | 0.023281 | 0.056571 | 0.020288         | 0.020130  | 0.272960 | 0.053524  | 0.296346 |
| GM-CSF                 | 0.449503 | 0.135376   | 0.172404 | 0.648545 | 0.204314    | 0.100909    | 0.161138    | 0.955596    | 0.021766 | 0.968726 | 0.168173 | 0.103641  | 0.145229 | 0.125053 | 0.159199         | 0.462718  | 0.250454 | 0.234931  | 0.283769 |
| M-CSF                  | 0.034442 | 0.067172   | 0.033789 | 0.894102 | 0.092521    | 0.152229    | 0.086379    | 0.299101    | 0.469543 | 0.769497 | 0.059959 | 0.124938  | 0.094943 | 0.102735 | 0.041577         | 0.166302  | 0.315194 | 0.170407  | 0.339928 |
| TGFβ                   | 0.002745 | 0.004288   | 0.001126 | 0.751666 | 0.010261    | 0.008632    | 0.003872    | 0.332553    | 0.038951 | 0.378559 | 0.004276 | 0.007781  | 0.009997 | 0.002956 | 0.001601         | 0.054487  | 0.049802 | 0.048747  | 0.072369 |
| VEGF                   | 0.774302 | 0.957164   | 0.983065 | 0.028074 | 0.563413    | 0.076326    | 0.820349    | 0.034507    | 0.125375 | 0.117352 | 0.832265 | 0.875228  | 0.710526 | 0.672113 | 0.871149         | 0.012313  | 0.746955 | 0.581788  | 0.504836 |
| Pearson <i>r</i> value |          |            |          |          |             |             |             |             |          |          |          |           |          |          |                  |           |          |           |          |
|                        | CD1a+    | CD1a-CD14- | CD14+    | BDCA3+   | BDCA3-CD14- | BDCA3-CD14+ | BDCA3+CD14- | BDCA3+CD14+ | CD80+    | CD80 MFI | CD163+   | CD163 MFI | CD16+    | CD16 MFI | CD14+CD163+CD16+ | PD-L1 MFI | PD-L1+   | PD-L2 MFI | PD-L2+   |
| CCL2                   | -0.30991 | -0.09311   | 0.18156  | 0.07222  | -0.15278    | 0.14634     | -0.11085    | 0.04015     | 0.05264  | -0.08748 | 0.12350  | 0.29042   | 0.05632  | 0.25934  | 0.19846          | 0.19445   | 0.14346  | 0.29834   | 0.15073  |
| CCL22                  | 0.00245  | 0.10883    | -0.07955 | -0.28937 | 0.08780     | 0.11611     | -0.06090    | -0.29248    | -0.00826 | -0.23898 | -0.05768 | -0.05683  | -0.06883 | -0.02121 | -0.07710         | -0.11685  | 0.02736  | -0.16893  | 0.02982  |
| CXCL10                 | -0.28236 | -0.20248   | 0.24900  | 0.08623  | -0.26470    | 0.16636     | -0.24829    | 0.26084     | 0.27660  | 0.19552  | 0.30126  | 0.09434   | 0.30187  | 0.14876  | 0.26516          | 0.31489   | 0.15176  | 0.13897   | 0.16677  |
| IL-6                   | -0.41406 | -0.16037   | 0.26761  | 0.25197  | -0.23303    | 0.09859     | -0.17624    | 0.28644     | 0.08366  | 0.01012  | 0.20366  | 0.32015   | 0.12662  | 0.30936  | 0.28133          | 0.39014   | 0.18118  | 0.37744   | 0.19175  |
| IL-8                   | -0.49656 | -0.31485   | 0.41045  | 0.19679  | -0.35142    | 0.25629     | -0.31497    | 0.27503     | 0.19507  | -0.07348 | 0.34663  | 0.44673   | 0.27801  | 0.45199  | 0.41447          | 0.45824   | 0.25216  | 0.43164   | 0.24676  |
| IL-10                  | -0.46808 | -0.44175   | 0.49042  | 0.31024  | -0.48597    | 0.24697     | -0.39230    | 0.54017     | 0.39788  | 0.17697  | 0.49525  | 0.41273   | 0.49262  | 0.42221  | 0.50240          | 0.50294   | 0.25073  | 0.42702   | 0.23920  |
| GM-CSF                 | 0.17444  | 0.33687    | -0.30934 | 0.10565  | 0.28873     | -0.36782    | 0.31724     | 0.01294     | -0.49744 | -0.00911 | -0.31226 | -0.36511  | -0.32907 | -0.34548 | -0.31864         | -0.16947  | -0.26243 | -0.27090  | -0.24533 |
| M-CSF                  | -0.46323 | -0.40688   | 0.46473  | 0.03094  | -0.37650    | 0.32376     | -0.38323    | 0.23788     | 0.16693  | -0.06804 | 0.41709  | 0.34558   | 0.37394  | 0.36600  | 0.44821          | 0.31357   | 0.23031  | 0.31071   | 0.21912  |
| TGFβ                   | -0.61949 | -0.59682   | 0.66020  | -0.07346 | -0.54713    | 0.55759     | -0.60216    | 0.22240     | 0.45348  | -0.20255 | 0.59697  | 0.56372   | 0.54873  | 0.61585  | 0.64481          | 0.42548   | 0.43320  | 0.43501   | 0.40003  |
| VEGF                   | -0.15163 | 0.02857    | 0.01129  | 0.85988  | -0.30006    | -0.76504    | 0.12035     | 0.84423     | 0.69497  | 0.70546  | 0.11230  | 0.08337   | 0.19547  | 0.22225  | 0.08611          | 0.90798   | 0.17034  | 0.28666   | 0.34364  |
