# Supplementary material for: A Reconstructed Human Melanoma-in-Skin Model to Study Immune Modulatory and Angiogenic Mechanisms Facilitating Initial Melanoma Growth and Invasion
Source: MDPI journal article supplement (doi:10.3390/cancers15102849), 2023-05-20
Supplement: s1 [file s1]

| Cytokine | RhS            | A375-RhS      | COLO829-RhS     | G361-RhS       | MeWo-RhS        | RPMI-7951-RhS | SK-MEL-28-RhS  |
|----------|----------------|---------------|-----------------|----------------|-----------------|---------------|----------------|
| CCL2     | 14506 ± 4575   | 84492 ± 39764 | 6568 ± 415.1    | 7488 ± 91.83   | 7242 ± 162.2    | 6151 ± 215.5  | 13667 ± 3817   |
| CCL5     | 37.27 ± 12.21  | 86.66 ± 17.54 | 55.86 ± 19.81   | 81.71 ± 22.65  | 90.16 ± 30.25   | 42.13 ± 9.477 | 183.7 ± 25.54  |
| CXCL10   | 65.75 ± 28.15  | 69.25 ± 29.59 | 82.98 ± 36.85   | 113.7 ± 71.38  | 184.7 ± 80.83   | 34.7 ± 21.58  | 353.5 ± 137.4  |
| IL-6     | 3886 ± 1395    | 20962 ± 9180  | 3712 ± 812.7    | 12153 ± 3559   | 11837 ± 3594    | 3528 ± 250.4  | 7930 ± 2728    |
| IL-8     | 3771 ± 1594    | 19649 ± 4738  | 2968 ± 701.7    | 8070 ± 3461    | 8886 ± 738.6    | 2461 ± 366.3  | 8927 ± 3673    |
| IL-10    | 1.657 ± 1.514  | 149.7 ± 44.59 | 0.7588 ± 0.7588 | 0              | 0.9325 ± 0.9325 | 0             | 61.39 ± 9.154  |
| GM-CSF   | 50.2 ± 8.126   | 148.5 ± 23.68 | 55.61 ± 18.79   | 76.6 ± 24.72   | 78.07 ± 23.1    | 52.29 ± 11.39 | 117.3 ± 16     |
| M-CSF    | 667.2 ± 157.8  | 1158 ± 227.2  | 1037 ± 77.72    | 1213 ± 54.38   | 1182 ± 87.5     | 917.2 ± 32.54 | 820.2 ± 162.7  |
| TGFβ     | 495.5 ± 30.05  | 688.3 ± 64.73 | 456.7 ± 46.05   | 482.9 ± 23.68  | 478.8 ± 30.48   | 442.7 ± 15.96 | 618.7 ± 28.93  |
| bFGF     | 4.714 ± 0.9627 | 6.053 ± 1.361 | 7.158 ± 0.6177  | 7.614 ± 0.4998 | 7.395 ± 0.6866  | 6.394 ± 1.067 | 5.082 ± 0.8192 |
| Flt-1    | 221.2 ± 33.44  | 464.7 ± 90.62 | 272.5 ± 57.05   | 391.8 ± 122.1  | 459.8 ± 169.6   | 248 ± 67.23   | 395.7 ± 74.89  |
| PlGF     | 468 ± 58.2     | 937.3 ± 111.9 | 367.5 ± 65.27   | 474 ± 114.7    | 384.6 ± 95.64   | 344.9 ± 73.49 | 477.3 ± 61.8   |
| Tie-2    | 12.36 ± 1.751  | 22.26 ± 3.799 | 2.924 ± 1.502   | 2.424 ± 1.197  | 1.447 ± 0.9494  | 0             | 18.46 ± 2.441  |
| VEGF     | 15838 ± 1493   | 26412 ± 3121  | 11781 ± 1005    | 15459 ± 2439   | 25497 ± 5001    | 12046 ± 1114  | 23703 ± 2935   |
| VEGF-C   | 1032 ± 189.9   | 1639 ± 292.2  | 945.4 ± 229.6   | 778.5 ± 150.1  | 710.6 ± 164.1   | 850.3 ± 161.1 | 617.5 ± 66.57  |
| VEGF-D   | 50.64 ± 11.54  | 87.07 ± 20.26 | 42.48 ± 7.53    | 33.36 ± 4.92   | 35.87 ± 10.05   | 31.74 ± 5.264 | 48.21 ± 11.3   |
