# Supplementary material for: A Reconstructed Human Melanoma-in-Skin Model to Study Immune Modulatory and Angiogenic Mechanisms Facilitating Initial Melanoma Growth and Invasion
Source: MDPI journal article supplement (doi:10.3390/cancers15102849), 2023-05-20
Supplement: s1 [file s1]

| p value         | CD1a+      | CD1a-CD14- | CD14+     | BDCA3+      | BDCA3-CD14- | BDCA3-CD14+ | BDCA3+CD14- | BDCA3+CD14+ | CD80+     | CD80 MFI  | CD163+    | CD163 MFI | CD16+     | CD16 MFI         | CD14+CD163+CD16+ | PD-L1+    | PD-L1 MFI | PD-L2+    | PD-L2 MFI |
|-----------------|------------|------------|-----------|-------------|-------------|-------------|-------------|-------------|-----------|-----------|-----------|-----------|-----------|------------------|------------------|-----------|-----------|-----------|-----------|
| IL-6            | 0.566340   | 0.497208   | 0.705485  | 0.163711    | 0.226820    | 0.940852    | 0.970656    | 0.253647    | 0.329764  | 0.311409  | 0.787161  | 0.979386  | 0.681586  | 0.506113         | 0.526620         | 0.149104  | 0.074669  | 0.172146  | 0.032416  |
| IL-8            | 0.599937   | 0.564227   | 0.739890  | 0.059851    | 0.199063    | 0.980599    | 0.939462    | 0.182013    | 0.462123  | 0.388216  | 0.549260  | 0.763992  | 0.697427  | 0.697946         | 0.694804         | 0.065855  | 0.024026  | 0.167916  | 0.017167  |
| CXCL10          | 0.139219   | 0.751087   | 0.534977  | 0.382039    | 0.832484    | 0.718230    | 0.953138    | 0.585787    | 0.869414  | 0.437987  | 0.934267  | 0.561376  | 0.118981  | 0.180866         | 0.097945         | 0.259120  | 0.191265  | 0.297249  | 0.055466  |
| CCL2            | 0.693415   | 0.373143   | 0.567059  | 0.004238    | 0.209313    | 0.568373    | 0.175441    | 0.003255    | 0.132623  | 0.061141  | 0.837639  | 0.912877  | 0.501435  | 0.246335         | 0.450047         | 0.216393  | 0.020589  | 0.588459  | 0.214266  |
| CCL5            | 0.221260   | 0.975944   | 0.754002  | 0.086790    | 0.488875    | 0.750294    | 0.880305    | 0.269979    | 0.727195  | 0.366598  | 0.737691  | 0.930032  | 0.257846  | 0.436158         | 0.306669         | 0.066600  | 0.027180  | 0.192536  | 0.008709  |
| VEGF            | 0.315963   | 0.759816   | 0.627339  | 0.610769    | 0.799957    | 0.964407    | 0.532920    | 0.948147    | 0.867101  | 0.860702  | 0.696745  | 0.788031  | 0.100095  | 0.071798         | 0.075714         | 0.282859  | 0.322844  | 0.246683  | 0.066847  |
| IL-10           | 0.946256   | 0.982846   | 0.938422  | 0.932465    | 0.771562    | 0.702597    | 0.997989    | 0.758208    | 0.896934  | 0.669116  | 0.305868  | 0.168834  | 0.816738  | 0.575086         | 0.417391         | 0.187821  | 0.707109  | 0.544127  | 0.810669  |
| TGFβ            | 0.115299   | 0.888780   | 0.609571  | 0.020666    | 0.699310    | 0.299653    | 0.407207    | 0.041224    | 0.578889  | 0.080649  | 0.521627  | 0.300938  | 0.287164  | 0.627054         | 0.234675         | 0.408574  | 0.031262  | 0.578935  | 0.045041  |
| M-CSF           | 0.411972   | 0.413290   | 0.688034  | 0.043791    | 0.347541    | 0.466835    | 0.005039    | 0.013596    | 0.065102  | 0.015055  | 0.544995  | 0.740748  | 0.296428  | 0.018228         | 0.177926         | 0.244427  | 0.110815  | 0.623570  | 0.475130  |
| Pearson r value |            |            |           |             |             |             |             |             |           |           |           |           |           |                  |                  |           |           |           |           |
| CD1a+           | CD1a-CD14- | CD14+      | BDCA3+    | BDCA3-CD14- | BDCA3-CD14+ | BDCA3+CD14- | BDCA3+CD14+ | CD80+       | CD80 MFI  | CD163+    | CD163 MFI | CD16+     | CD16 MFI  | CD14+CD163+CD16+ | PD-L1+           | PD-L1 MFI | PD-L2+    | PD-L2 MFI |           |
| IL-6            | 0.240385   | -0.282885  | 0.159773  | 0.543634    | -0.481683   | 0.031567    | -0.015653   | 0.458116    | 0.397283  | 0.411271  | 0.114511  | -0.010995 | -0.173257 | -0.277293        | -0.264554        | 0.559732  | 0.660399  | 0.534693  | 0.749134  |
| IL-8            | 0.220400   | -0.241656  | 0.140566  | 0.686885    | -0.507633   | 0.010348    | 0.032309    | 0.524527    | 0.305310  | 0.354978  | 0.250701  | 0.127238  | -0.164305 | -0.164069        | -0.165784        | 0.675732  | 0.774536  | 0.539146  | 0.799806  |
| CXCL10          | 0.571124   | -0.134362  | -0.259416 | 0.359306    | -0.089824   | -0.152631   | -0.025004   | 0.228770    | 0.069873  | 0.321136  | -0.040435 | -0.243372 | -0.595941 | -0.525694        | -0.624416        | 0.453465  | 0.515260  | 0.422333  | 0.695459  |
| CCL2            | 0.166567   | -0.365594  | 0.239953  | 0.876953    | -0.497843   | -0.239165   | 0.531264    | 0.887632    | 0.578976  | 0.684434  | -0.087031 | 0.046533  | 0.280226  | 0.464409         | 0.313185         | 0.491226  | 0.786540  | 0.227185  | 0.493201  |
| CCL5            | 0.486743   | 0.012831   | -0.132750 | 0.640958    | -0.288154   | -0.134800   | 0.064012    | 0.444381    | 0.147627  | 0.370264  | 0.141787  | -0.037351 | -0.454543 | -0.322350        | -0.414947        | 0.674391  | 0.764428  | 0.514005  | 0.842127  |
| VEGF            | 0.407765   | 0.129540   | -0.204372 | 0.214037    | -0.107515   | 0.018988    | -0.260678   | 0.027669    | -0.071119 | 0.074568  | 0.164689  | -0.114035 | -0.621354 | -0.665272        | -0.658653        | 0.433838  | 0.402513  | 0.464107  | 0.739498  |
| IL-10           | -0.028679  | -0.009149  | 0.032865  | 0.036050    | -0.123071   | 0.161396    | -0.001072   | -0.130427   | -0.055080 | -0.180344 | 0.415570  | 0.538174  | 0.098372  | 0.235145         | 0.334930         | 0.518682  | 0.158861  | 0.253824  | 0.101675  |
| TGFβ            | -0.600705  | -0.059457  | 0.214739  | -0.786257   | 0.163245    | 0.420437    | -0.341857   | -0.726510   | -0.232875 | -0.650595 | 0.267639  | 0.419427  | 0.430367  | 0.204537         | 0.474642         | -0.340923 | -0.752367 | -0.232847 | -0.717625 |
| M-CSF           | 0.338607   | -0.337710  | 0.169607  | 0.720482    | -0.384078   | -0.302260   | 0.869391    | 0.815562    | 0.677097  | 0.808844  | -0.253295 | 0.140090  | 0.422982  | 0.795528         | 0.528701         | 0.466066  | 0.606625  | 0.206563  | 0.296921  |
