# Supplementary figures and images for: A Reconstructed Human Melanoma-in-Skin Model to Study Immune Modulatory and Angiogenic Mechanisms Facilitating Initial Melanoma Growth and Invasion
Source: MDPI journal article supplement (doi:10.3390/cancers15102849), 2023-05-20

(a) pro-inflammation

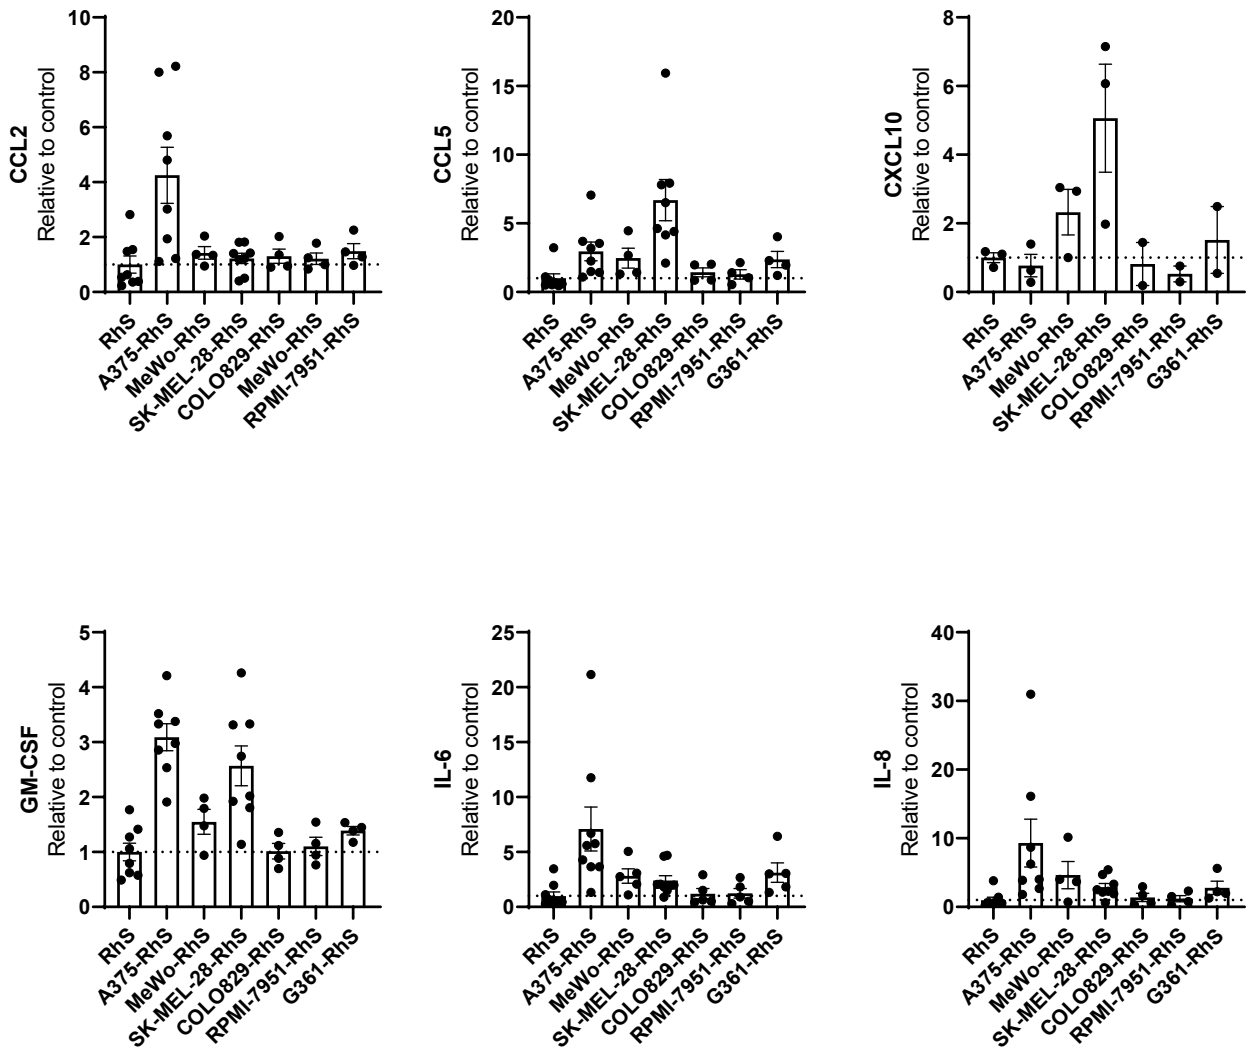

(b) anti-inflammation

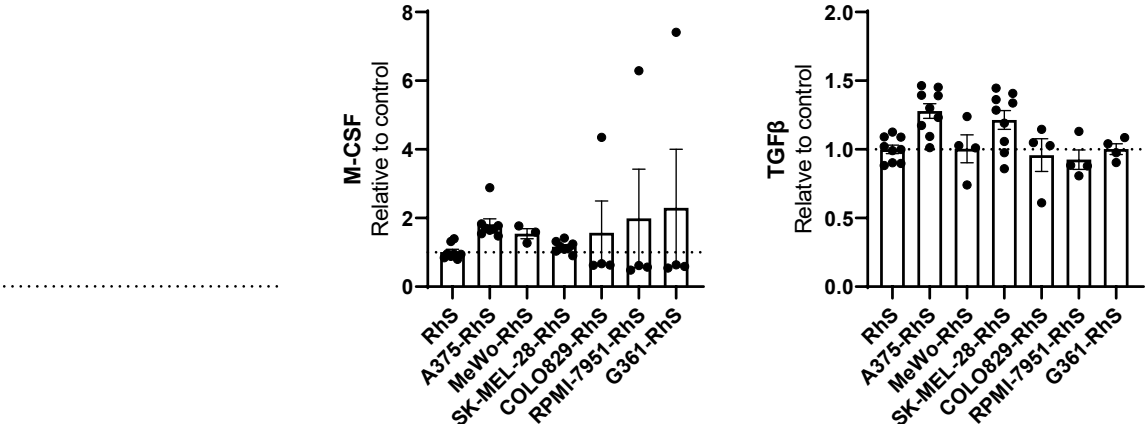

Supplement: s1 [file s1]

## 3D model

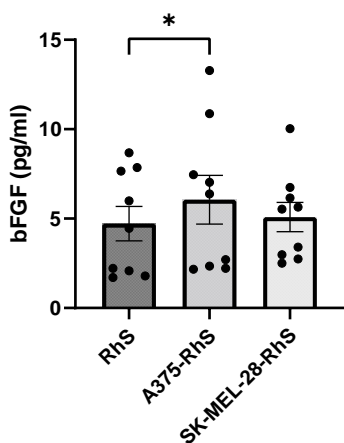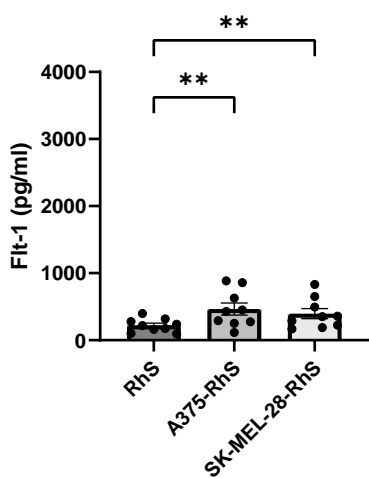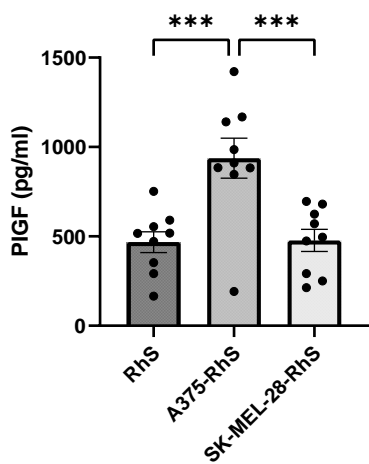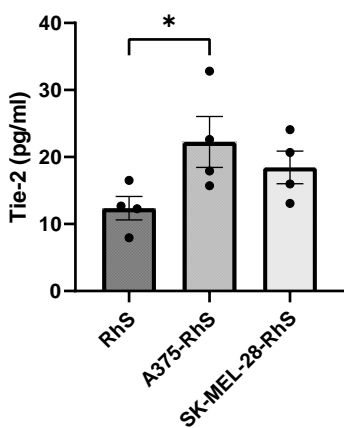

## 2D culture

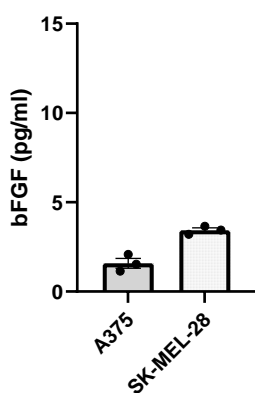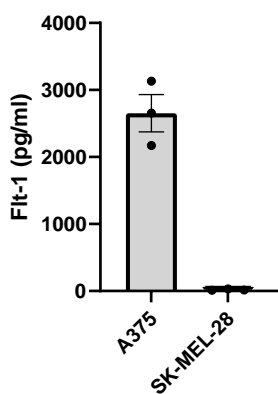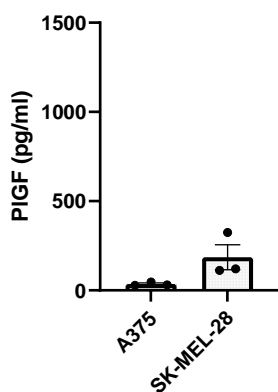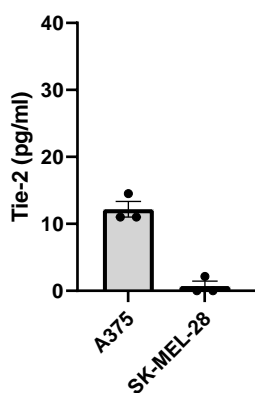

## 3D model

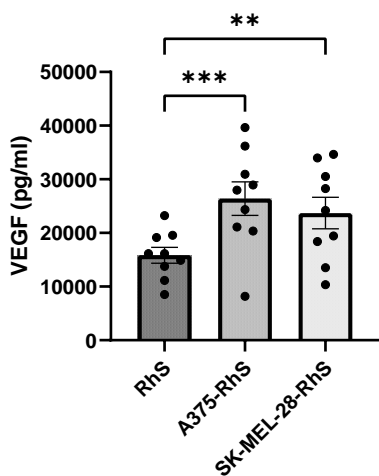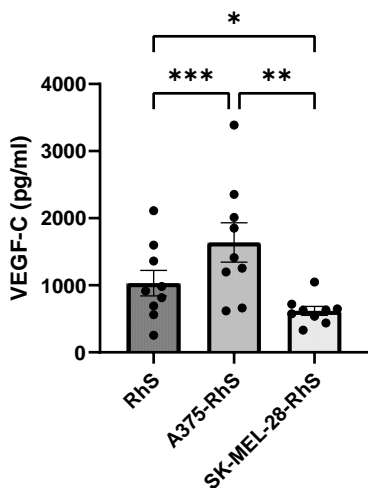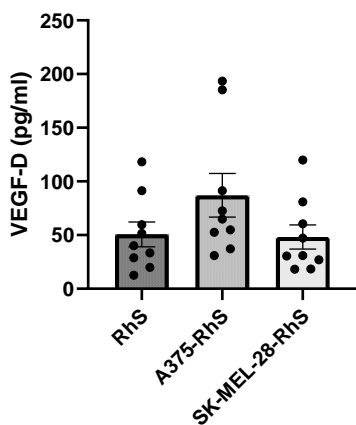

## 2D culture

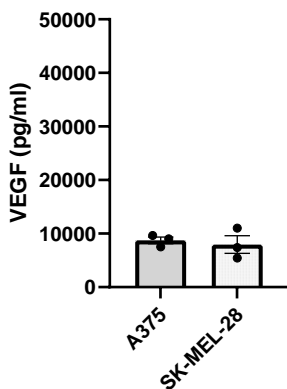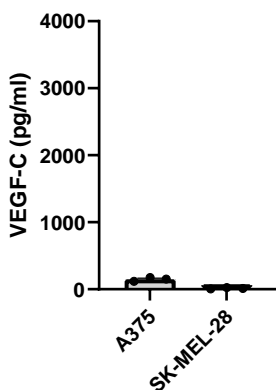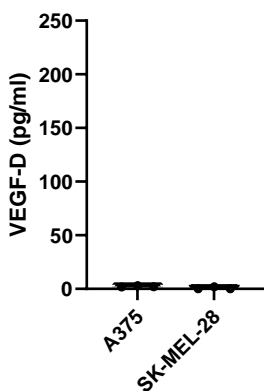

Supplement: s1 [file s1]

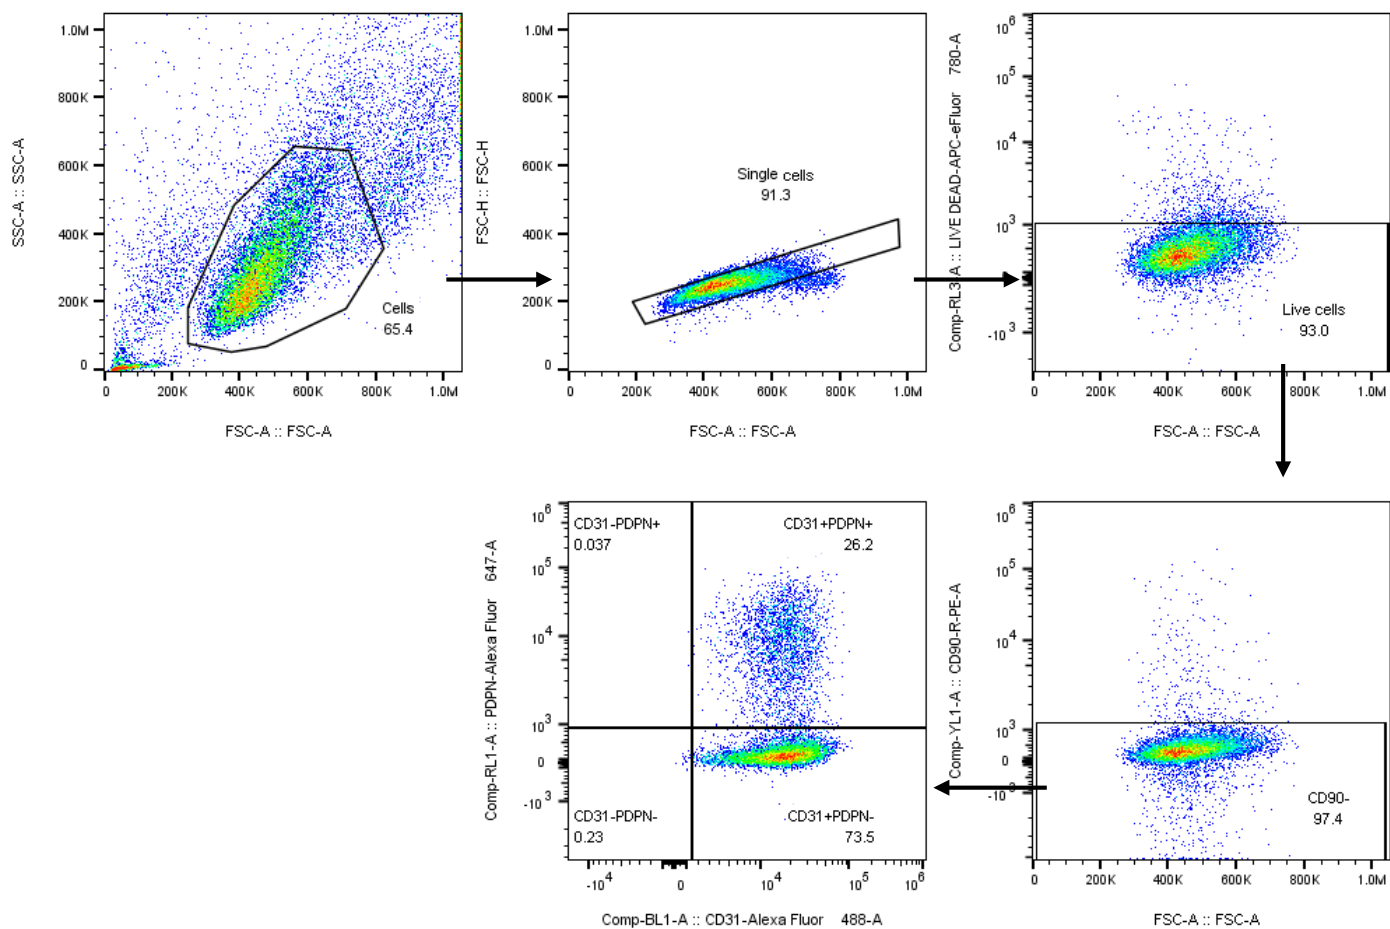

Supplement: s1 [file s1]

RPMI-7951-RhS

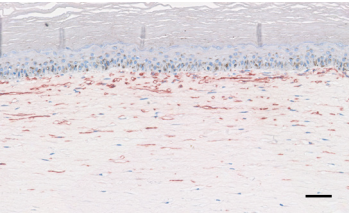

COLO829-RhS

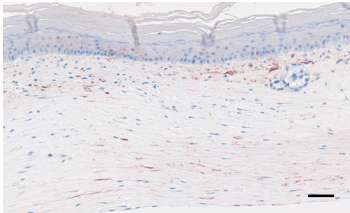

G361-RhS

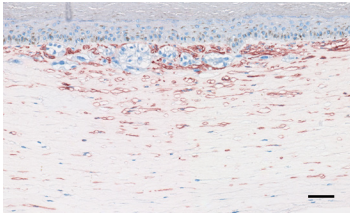

MeWo-RhS

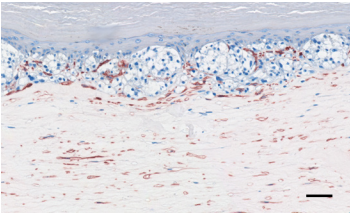

Supplement: s1 [file s1]

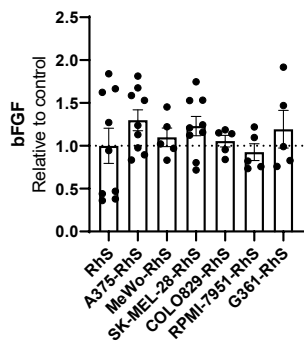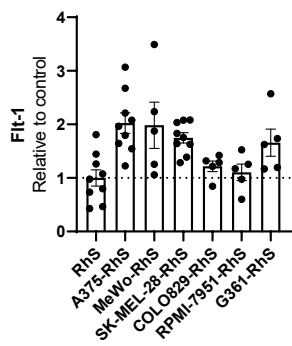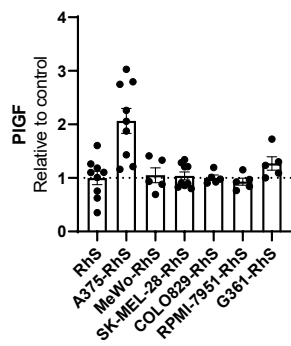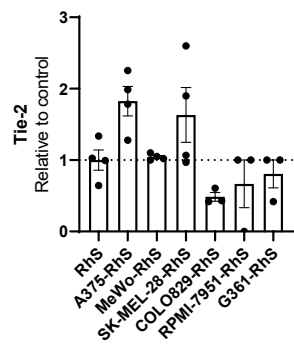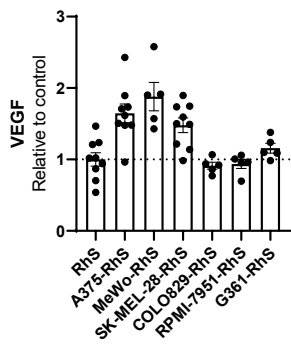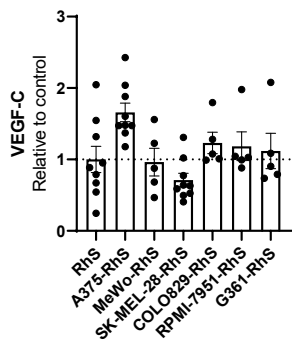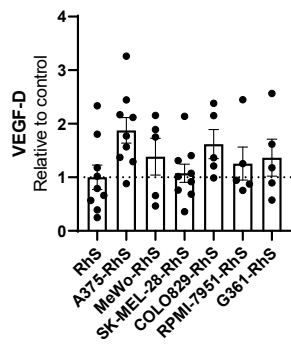

Supplement: s1 [file s1]
